# Supplementary material for: Relationship between tumour PTEN/Akt/COX-2 expression, inflammatory response and survival in patients with colorectal cancer
Source: PubMed Central journal article supplement (PMC5342577; doi:10.18632/oncotarget.12134), 2016-09-20
Supplement: oncotarget-07-70601-s001.pdf [file oncotarget-07-70601-s001.pdf]

## Relationship between tumour PTEN/Akt/COX-2 expression, inflammatory response and survival in patients with colorectal cancer

### SUPPLEMENTARY FIGURE AND TABLE

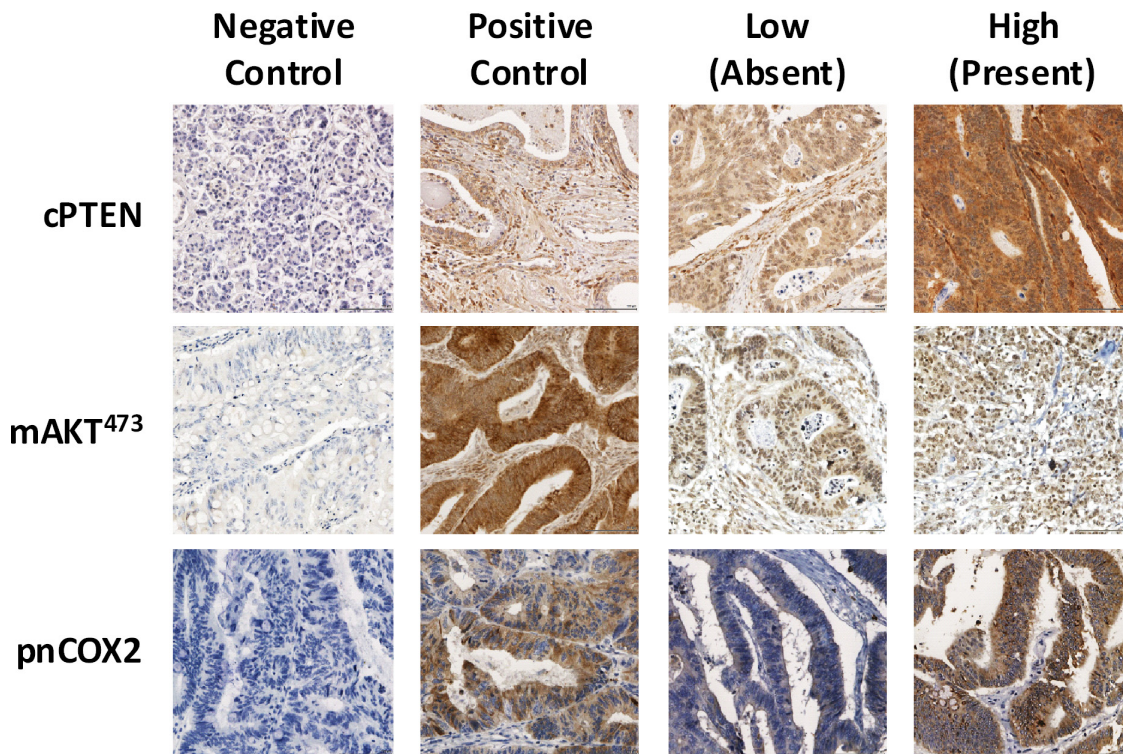

**Supplementary Figure 1: Immunohistochemical staining for cPTEN, mAkt<sup>473</sup> and nCOX2.** Representative images of staining for all three proteins are shown (x400). Negative and positive controls are also shown for each.

Supplementary Table 1: Patient characteristics for CRC cohort (n=201)

| Clinicopathological Characteristics     | N (%)    |
|-----------------------------------------|----------|
| <b>Age</b>                              |          |
| <65                                     | 81 (40)  |
| >65                                     | 120 (60) |
| <b>Sex</b>                              |          |
| Female                                  | 96 (48)  |
| Male                                    | 105 (52) |
| <b>Adjuvant</b>                         |          |
| No                                      | 145 (72) |
| Yes                                     | 56 (28)  |
| <b>Tumour site</b>                      |          |
| Colon                                   | 133 (66) |
| Rectum                                  | 68 (34)  |
| <b>TNM stage</b>                        |          |
| 1                                       | 14 (7)   |
| 2                                       | 96 (48)  |
| 3                                       | 91 (45)  |
| <b>Differentiation</b>                  |          |
| Mod/well                                | 178 (89) |
| Poor                                    | 23 (11)  |
| <b>Venous invasion</b>                  |          |
| Absent                                  | 130 (65) |
| Present                                 | 71 (35)  |
| <b>Margin involvement</b>               |          |
| No                                      | 194 (97) |
| Yes                                     | 7 (3)    |
| <b>Peritoneal involvement</b>           |          |
| No                                      | 150 (75) |
| Yes                                     | 51 (25)  |
| <b>Mismatch repair status</b>           |          |
| Competent                               | 174 (87) |
| Deficient                               | 27 (13)  |
| <b>Proliferation Index</b>              |          |
| Low                                     | 72 (36)  |
| High                                    | 129 (64) |
| <b>Necrosis</b>                         |          |
| Low                                     | 122 (61) |
| High                                    | 79 (39)  |
| <b>Tumour stroma percentage (n=182)</b> |          |
| Low                                     | 140 (77) |
| High                                    | 42 (23)  |
| <b>Tumour Budding (n=186)</b>           |          |
| No                                      | 126 (68) |
| Yes                                     | 60 (32)  |
